# Supplementary material for: Perioperative risk factors for new-onset postoperative atrial fibrillation after coronary artery bypass grafting: a systematic review
Source: PubMed Central journal article supplement (PMC8414730; doi:10.1186/s12872-021-02224-x), 2021-09-03
Supplement: 12872_2021_2224_MOESM1_ESM.pdf [file 12872_2021_2224_MOESM1_ESM.pdf]

**Supplementary material. The raw data of the significant continuous variables**

| Reviewed articles            | New-onset POAF (n) | Sinus rhythm (n) | Age (mean, SD) |               | preOP SCr[mg/dL] (mean, SD) |             | Hemoglobin (mean,SD) |              | preOP LVEF[%] (mean, SD) |               | CBP time[min] (mean, SD) |               |
|------------------------------|--------------------|------------------|----------------|---------------|-----------------------------|-------------|----------------------|--------------|--------------------------|---------------|--------------------------|---------------|
|                              |                    |                  | AF             | SR            | AF                          | SR          | AF                   | SR           | AF                       | SR            | AF                       | SR            |
| Mendes et al. (1995) [21]    | 57                 | 111              | ☐              | ☐             | ☐                           | ☐           | ☐                    | ☐            | ☐                        | ☐             | ☐                        | ☐             |
| Cerillo et al. (2003) [22]   | 33                 | 74               | 70.2 ± 9.4     | 65.8 ± 9.8    | ☐                           | ☐           | ☐                    | ☐            | 50.5 ± 9.0               | 53.9 ± 9.7    | 94.4 ± 23.9              | 96.1 ± 29.5   |
| Zangrillo et al. (2004) [23] | 33                 | 127              | 68.0 ± 8.8     | 64.0 ± 8.7    | ☐                           | ☐           | 14 ± 1.7             | 14 ± 2.6     | ☐                        | ☐             | ☐                        | ☐             |
| Akazawa et al. (2008) [24]   | 26                 | 124              | 71.0 ± 8.0     | 66.0 ± 10.0   | ☐                           | ☐           | ☐                    | ☐            | 49.0 ± 14.0              | 57.0 ± 12.0   | ☐                        | ☐             |
| Wang et al. (2012) [25]      | 60                 | 137              | 71.0 ± 11.0    | 64.0 ± 13.0   | 2.1 ± 2.1                   | 1.8 ± 2.0   | ☐                    | ☐            | 41.0 ± 11.0              | 48.0 ± 11.0   | ☐                        | ☐             |
| Koolen et al. (2013) [26]    | 1080               | 2068             | 69.8 ± 8.7     | 64.7 ± 9.8    | 1.12 ± 0.80                 | 1.03 ± 0.68 | 8.6 ± 1.0            | 8.7 ± 1.0    | ☐                        | ☐             | ☐                        | ☐             |
| Tsai et al. (2015) [27]      | 126                | 140              | 69.90 ± 11.62  | 61.84 ± 10.76 | ☐                           | ☐           | ☐                    | ☐            | 48.94 ± 15.19            | 58.19 ± 13.02 | 113.24 ± 58.88           | 98.86 ± 55.01 |
| Vlahou et al. (2016) [28]    | 111                | 335              | 68.08 ± 8.5    | 63.05 ± 9.4   | ☐                           | ☐           | ☐                    | ☐            | 52.8 ± 12.6              | 53.6 ± 10.6   | 97.8 ± 36.1              | 91.1 ± 34.1   |
| Daie et al. (2018) [29]      | 29                 | 127              | 63.89 ± 8.91   | 61.19 ± 8.90  | 1.00 ± 0.36                 | 1.00 ± 0.28 | 13.42 ± 1.35         | 13.68 ± 1.72 | 52.70 ± 10.34            | 54.73 ± 9.32  | ☐                        | ☐             |

Abbreviations: POAF; postoperative atrial fibrillation, SD; standard deviation
